# Supplementary material for: Quantification of mitral regurgitation in patients with hypertrophic cardiomyopathy using aortic and pulmonary flow data: impacts of left ventricular outflow tract obstruction and different left ventricular segmentation methods
Source: Springer Nature journal article supplement (doi:10.1186/s12968-017-0417-8), 2016-12-01

# HCM patient without LVOTO

**Aortic flow (ml/s)**

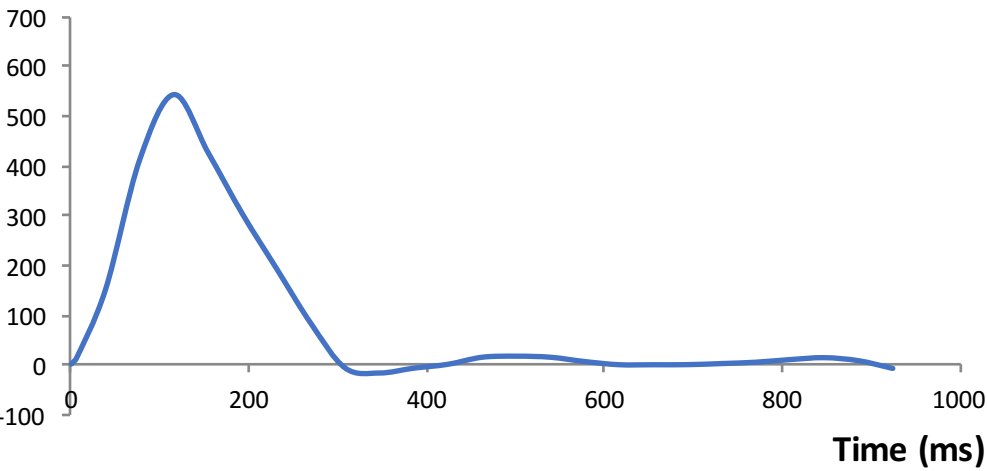

**Pulmonary flow (ml/s)**

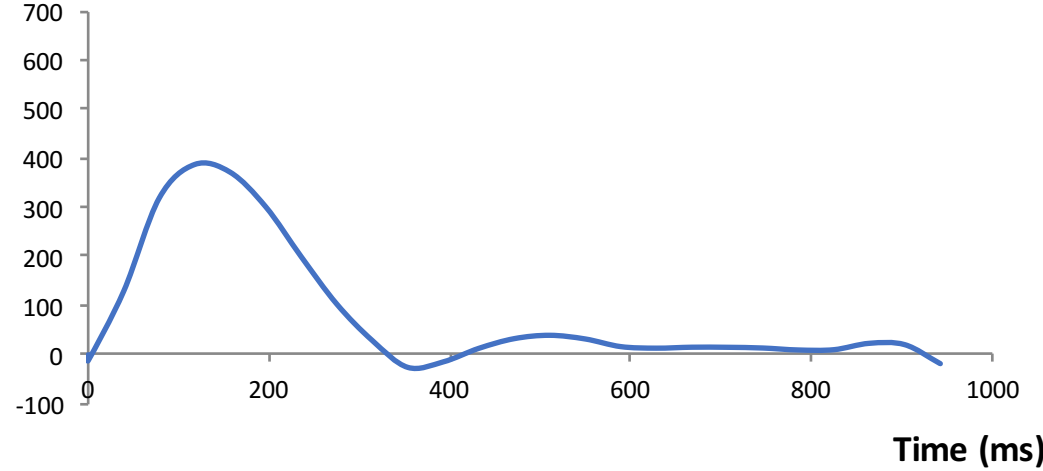

# HCM patient with LVOTO

**Aortic flow [ml/s]**

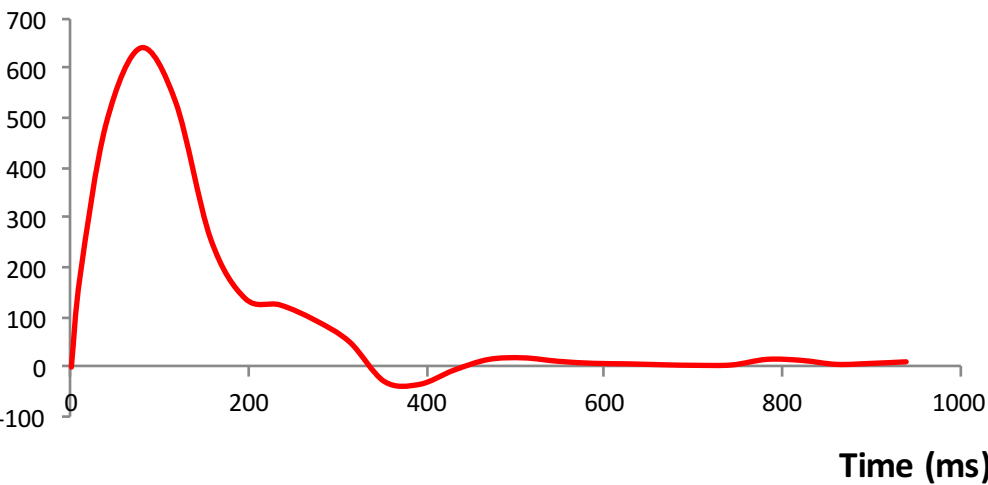

**Pulmonary flow [ml/s]**

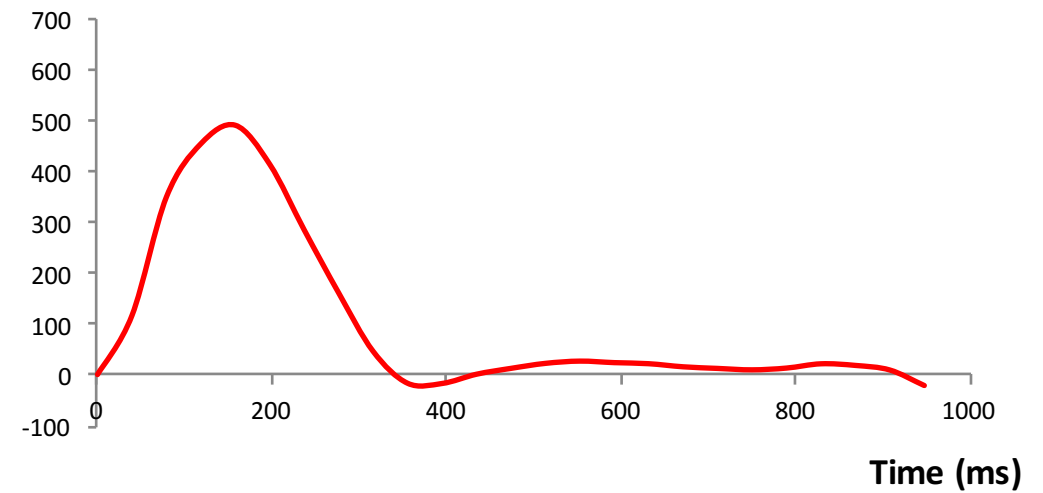

Supplement: MOESM1 [file 15327334]
